# Supplementary material
Source: MDPI journal article supplement (https://www.mdpi.com/2311-5637/8/6/248)
Supplement: s1 [file s1]

**Supplementary table S1.** Primers used in the present study

| Items                            | Primer sequence (5'- 3')                                      | Temperature (°C) |
|----------------------------------|---------------------------------------------------------------|------------------|
| Total bacteria                   | F: CGGCAACGAGCGCAACCC<br>R: CCATTGTAGCACGTGTGTAGCC            | 55               |
| <i>Ruminococcus albus</i>        | F: CCCTAA AAGCAG TCTTAGTTCC<br>R: CCTCCTTGCGGTTAGAACA         | 55               |
| <i>Ruminococcus flavefaciens</i> | F: TCTGGAAACGGATGGTA<br>R: CCTTTAAGACAGGAGTTTACAA             | 60               |
| <i>Fibrobacter succinogenes</i>  | F: GTTCGGAATTACTGGGCGTAAA<br>R: CGCCTGCCCCTGAACTATC           | 55               |
| <i>Butyrivibrio fibrisolvens</i> | F: ACACACCGCCCGTCACA<br>R: TCCTTACGGTTGGGTCACAGA              | 58               |
| <i>Megasphaera elsdenii</i>      | F: GACCGAAACTGCGATGCTAGA<br>R: CGCCTCAGCGTCAGTTGTC            | 59               |
| <i>Streptococcus bovis</i>       | F: GCCA GGCTATTTAGGTGACACTATAG<br>R: GGGT AATACGACTCACTATAGGG | 58               |
| Methanogen                       | F: TTCGGTGGATCDCARAGRGC<br>R: GBARGTCGWAWCCGTAGAATC           | 58               |
| Protozoa                         | F: CTTGCCCCTCYAATCGTWCT<br>R: GCTTTCGWTGGTAGTGTATT            | 55               |
